# Supplementary material for: QTL for induced resistance against leaf rust in barley
Source: Front Plant Sci. 2023 Jan 12;13:1069087. doi: 10.3389/fpls.2022.1069087 (PMC9877528; doi:10.3389/fpls.2022.1069087)
Supplement: Supplementary file 4 [file Table_1.xlsx]

## Sheet: publication GWAS leaf rust
Supplementary Table S1: List of the 200 spring barley accessions investigated in this study, including genotype name, country of origin and row type as well as the available genotyping platform and the effect (p value) of the priming treatment for each accession. Our study panel consisted of 111 two-rowed and 83 six-rowed accessions from the “Genobar” panel (the spring barley IPK-SB224 panel, Has…
ID	Accession	Genotype	Country of origin*	row type	Genotyping platform	p value
45	BCC768	Ulleri 2	NPL	6-row	iSelect, EC	<0.001
130	BCC1428	Archer	GBR	2-row	iSelect, EC	<0.001
44	BCC766	Ulleri 1	NPL	6-row	iSelect, EC	<0.001
42	BCC732	Gho 4	NPL	6-row	iSelect, EC	<0.001
163	BCC1476	Afrasiab	UZB	6-row	iSelect, EC	<0.001
5	BCC129	IG 31925	MAR	6-row	iSelect, GBS, EC	<0.001
119	BCC1415	Spratt Archer	GBR	2-row	iSelect, GBS, EC	<0.001
131	BCC1430	Chevallier	FRA	2-row	iSelect, GBS, EC	<0.001
14	BCC421	Xin Mai 1 Hao	CHN	6-row	iSelect, GBS, EC	<0.001
19	BCC436	Vladivostok	CHN	6-row	iSelect, GBS, EC	<0.001
30	BCC538	Rewari	IND	6-row	iSelect, GBS, EC	<0.001
64	BCC881	Husky	CAN	6-row	iSelect, GBS, EC	<0.001
2	BCC93	IQ 761	IRQ	2-row	iSelect, GBS, EC	<0.001
212		Morex	USA	6-row	iSelect, GBS, EC	<0.001
91	BCC1383	Golf	GBR	2-row	iSelect, GBS, EC	<0.001
188	BCC1565	HOR 75	ALB	6-row	iSelect, GBS, EC	<0.001
175	BCC1493	Gelios	UKR	6-row	iSelect, GBS, EC	<0.001
38	BCC675	Hyanmaeg	KOR	2-row	iSelect, GBS, EC	<0.001
190	BCC1589	HOR 1555	ITA	2-row	iSelect, GBS, EC	<0.001
157	BCC1468	Tselinij 213	KAZ	2-row	iSelect, GBS, EC	<0.001
203	HOR11370	MR 1/13	ISR	2-row	iSelect, GBS, EC	<0.001
27	BCC532	Ratna	IND	6-row	iSelect, GBS, EC	<0.001
50	BCC812	Arupo	MEX	2-row	iSelect, GBS, EC	<0.001
101	BCC1395	Menuet	NLD	2-row	iSelect, GBS, EC	<0.001
196	HOR2835	FAO 345	IRN	6-row	iSelect, GBS, EC	<0.001
21	BCC439	Fengtien Black	CHN	6-row	iSelect, GBS, EC	<0.001
132	BCC1431	Goldfoil	AUT	2-row	iSelect, GBS, EC	<0.001
148	BCC1456	Viking	RUS	2-row	iSelect, GBS, EC	<0.001
25	BCC526	C-138	IND	6-row	iSelect, GBS, EC	<0.001
23	BCC446	Harbin Native	CHN	6-row	iSelect, GBS, EC	<0.001
28	BCC533	Lakhan	IND	6-row	iSelect, GBS, EC	<0.001
198	HOR7985	na	TUR	2-row	iSelect, GBS, EC	<0.001
31	BCC551	Churtanchan 1	IND	6-row	iSelect, GBS, EC	<0.001
7	BCC149	IG 3219	MAR	6-row	iSelect, GBS, EC	<0.001
10	BCC173	IG 12814	PAK	6-row	iSelect, GBS, EC	<0.001
86	BCC1378	Claret	GBR	2-row	iSelect, GBS, EC	<0.001
209	HOR12830	na	SYR	6-row	iSelect, GBS, EC	<0.001
32	BCC579	Bijoria	IND	6-row	iSelect, GBS, EC	<0.001
69	BCC903	Manley	CAN	2-row	iSelect, GBS, EC	<0.001
177	BCC1497	K 11749	KGZ	2-row	iSelect, GBS, EC	<0.001
186	BCC1541	Novosadski 294	YUG	2-row	iSelect, GBS, EC	<0.001
208	HOR11403	Kharsila	IND	6-row	iSelect	<0.001
210	HOR1391	na	ROM	2-row	iSelect	<0.001
216		GoldenPromise			iSelect	<0.001
61	BCC868	Gloria/Come	MEX	6-row	iSelect, GBS	<0.001
217		Großklappige			iSelect, GBS	<0.001
58	BCC857	Esperanza	MEX	6-row	iSelect, GBS	<0.001
109	BCC1403	Perun	DEU	2-row	iSelect, GBS	<0.001
51	BCC814	Atlas 68	USA	6-row	iSelect, GBS	<0.001
55	BCC846	CM 67	USA	6-row	iSelect, GBS	<0.001
75	HOR930	na	TUR	2-row	iSelect, GBS	<0.001
16	BCC427	E Dong 85-1	CHN	2-row	iSelect, EC	1
54	BCC844	Chia	COL	6-row	iSelect, EC	1
202	HOR8160	na	TUR	2-row	iSelect, EC	1
90	BCC1382	Golden Promise	GBR	2-row	iSelect, GBS, EC	1
93	BCC1385	Gryf	POL	2-row	iSelect, GBS, EC	1
169	BCC1484	K 9511	RUS	6-row	iSelect, GBS, EC	1
12	BCC192	IG 31444	SYR	2-row	iSelect, GBS, EC	1
67	BCC899	Libra	CHL	2-row	iSelect, GBS, EC	1
206	HOR11373	W 23833/2196 11	ISR	2-row	iSelect, GBS, EC	1
172	BCC1488	K 4972	RUS	6-row	iSelect	1
98	BCC1391	Isaria	DEU	2-row	iSelect, GBS	1
134	BCC1433	Heils Franken	DEU	2-row	iSelect, GBS	1
144	BCC1450	Pomo	FIN	6-row	iSelect, GBS	1
22	BCC445	Fuchin	CHN	6-row	iSelect, GBS	1
49	BCC807	Ancap 2	URY	6-row	iSelect, GBS	1
73	BCC927	Sacasco 1	PER	6-row	iSelect, GBS	1
200	HOR8050	na	TUR	2-row	iSelect, GBS, EC	1
78	BCC1368	Aramier	NLD	2-row	iSelect, GBS, EC	1
8	BCC161	IG 3286	MAR	6-row	iSelect, GBS	1
126	BCC1422	Varunda	NLD	2-row	iSelect, GBS, EC	1
193	HOR2800	FAO 3413	IRN	6-row	iSelect, GBS, EC	1
18	BCC434	E nong 82-63	CHN	2-row	iSelect, GBS	1
111	BCC1407	Probstdorfer Adorra	AUT	2-row	iSelect, GBS, EC	1
87	BCC1379	Diamant	CZE	2-row	iSelect, GBS, EC	0.999999
154	BCC1465	Doneckij 65	UKR	2-row	iSelect, GBS, EC	0.999999
9	BCC167	Shayir IG 32973	OMN	6-row	iSelect, GBS, EC	0.999999
71	BCC913	Otis	USA	2-row	iSelect, GBS	0.999998
106	BCC1400	Natasha	FRA	2-row	iSelect, GBS, EC	0.999996
174	BCC1491	K 1693	RUS	6-row	iSelect, EC	0.999991
160	BCC1471	Nutans 115	ARM	2-row	iSelect, GBS, EC	0.999988
83	BCC1374	Gambrinus	NLD	2-row	iSelect, GBS, EC	0.999984
185	BCC1529	Pumper	AUT	6-row	iSelect, GBS, EC	0.999976
34	BCC625	Dairokkaku	JPN	6-row	iSelect, GBS, EC	0.999952
35	BCC642	Nigatsuko	JPN	6-row	iSelect, GBS, EC	0.999855
215		Steptoe			iSelect, GBS, EC	0.999849
173	BCC1490	TULUNSK.23/11	RUS	6-row	iSelect, GBS, EC	0.999751
47	BCC801	AC Oxbow	CAN	2-row	iSelect, EC	0.999529
179	BCC1500	K 1628	TJK	6-row	iSelect, GBS, EC	0.999471
125	BCC1421	Valticky	CZE	2-row	iSelect, EC	0.999367
164	BCC1479	K 9338	RUS	6-row	iSelect, EC	0.998987
62	BCC869	Gobernadora	MEX	2-row	iSelect, GBS, EC	0.99882
141	BCC1445	Souche 142 Strotzheim	FRA	2-row	iSelect, GBS, EC	0.997901
84	BCC1376	Carlsberg II	DNK	2-row	iSelect, EC	0.997641
105	BCC1399	Nancy	SWE	2-row	iSelect, GBS, EC	0.996615
48	BCC806	Aliso	MEX	6-row	iSelect, GBS, EC	0.995944
145	BCC1452	Bigo	NLD	6-row	iSelect, GBS, EC	0.995803
181	BCC1504	Agul 2	RUS	6-row	iSelect, GBS	0.995757
99	BCC1392	Kenia	DNK	2-row	iSelect, GBS, EC	0.995267
171	BCC1487	K 2182	RUS	2-row	iSelect, GBS, EC	0.995267
133	BCC1432	Hana	CZE	2-row	iSelect, GBS, EC	0.995267
4	BCC126	IG 3193	MAR	6-row	iSelect, GBS, EC	0.995207
165	BCC1480	K 16411	RUS	2-row	iSelect, GBS, EC	0.994452
95	BCC1387	Hebe	NLD	2-row	iSelect, GBS, EC	0.994196
151	BCC1459	Temp	RUS	2-row	iSelect, GBS, EC	0.991097
36	BCC666	Buhobori	KOR	6-row	iSelect, GBS, EC	0.990773
108	BCC1402	Pallas	SWE	2-row	iSelect, GBS, EC	0.990693
112	BCC1408	Proctor	GBR	2-row	iSelect, GBS, EC	0.988991
96	BCC1389	Hunter	IRL	2-row	iSelect, GBS, EC	0.983641
161	BCC1472	Auksinjai	LTU	2-row	iSelect, GBS	0.982522
100	BCC1394	Mansholt, zweizeilig	NLD	2-row	iSelect, GBS, EC	0.975304
199	HOR8006	na	TUR	2-row	iSelect, GBS, EC	0.970702
166	BCC1481	K 3222	RUS	2-row	iSelect, GBS, EC	0.948972
46	BCC776	TKN24b	NPL	6-row	iSelect, GBS, EC	0.945121
53	BCC818	Belford	USA	6-row	iSelect, GBS, EC	0.912828
1	BCC3	IG 12889	AFG	2-row	iSelect, GBS	0.902826
180	BCC1503	K 1877	TKM	6-row	iSelect, GBS, EC	0.882742
68	BCC900	Lino	MEX	6-row	iSelect, GBS	0.877805
77	BCC1367	Apex	DEU	2-row	iSelect, GBS	0.796751
156	BCC1467	Zhodinskij 5	BLR	2-row	iSelect, GBS, EC	0.779931
197	HOR4727	na	TUR	6-row	iSelect, GBS, EC	0.735404
57	BCC852	Diamond	CAN	6-row	iSelect, GBS, EC	0.679053
6	BCC131	IG 31933	MAR	6-row	iSelect, GBS	0.673995
80	BCC1371	Beka	FRA	2-row	iSelect, GBS, EC	0.66872
66	BCC892	Kolla	BOL	6-row	iSelect, EC	0.663142
167	BCC1482	Vjatich	RUS	2-row	iSelect, GBS, EC	0.652387
183	BCC1506	Odesskij 36	UKR	2-row	iSelect, GBS, EC	0.576118
149	BCC1457	Risk	RUS	2-row	iSelect, GBS, EC	0.548249
85	BCC1377	Ceres	FRA	2-row	iSelect, GBS, EC	0.530365
211		Barke			iSelect, GBS	0.524944
138	BCC1442	Plumage	GBR	2-row	iSelect, GBS, EC	0.509238
29	BCC535	PL 172	IND	6-row	iSelect, GBS, EC	0.504424
162	BCC1474	Klepeninskij	UKR	6-row	iSelect, GBS, EC	0.502972
150	BCC1458	Ilmen	RUS	2-row	iSelect, GBS, EC	0.500961
146	BCC1453	Olli	FIN	6-row	iSelect, GBS, EC	0.468889
56	BCC847	Compana	USA	2-row	iSelect, GBS, EC	0.450446
76	BCC942	Unitan	USA	6-row	iSelect, GBS	0.409565
170	BCC1485	Pallidum 45	RUS	6-row	iSelect, GBS, EC	0.39948
65	BCC888	Keystone	CAN	6-row	iSelect, GBS	0.388515
81	BCC1372	Bielik	POL	2-row	iSelect, GBS	0.381988
191	HOR1804	na	AFG	6-row	iSelect, GBS	0.355714
63	BCC875	Hazen	USA	6-row	iSelect, GBS, EC	0.354452
3	BCC118	IG 128216	LBY	6-row	iSelect, GBS, EC	0.346763
155	BCC1466	Odesskij 1	UKR	2-row	iSelect, GBS, EC	0.344057
218		Roland			iSelect	0.331608
194	HOR2828	FAO 3443	IRN	2-row	iSelect, GBS, EC	0.313317
137	BCC1441	Pflugs Intensiv	DEU	2-row	iSelect, GBS	0.303661
60	BCC861	FNC 6-1	URY	2-row	iSelect, GBS	0.28471
102	BCC1396	Mette	SWE	2-row	iSelect, GBS, EC	0.283543
153	BCC1463	Primorskij 89	RUS	2-row	iSelect, GBS, EC	0.273602
103	BCC1397	MFB 14	HUN	2-row	iSelect, GBS, EC	0.251627
59	BCC860	FNC 1	URY	2-row	iSelect, GBS, EC	0.198562
147	BCC1455	Belogorskij	RUS	6-row	iSelect, GBS, EC	0.18011
168	BCC1483	K 4511	RUS	2-row	iSelect, GBS, EC	0.179716
121	BCC1417	Trumpf	DEU	2-row	iSelect, GBS	0.179066
176	BCC1494	K 4847	KAZ	6-row	iSelect, GBS	0.171608
136	BCC1440	Pammers Hohenauer Vollkorn	AUT	2-row	iSelect, GBS, EC	0.161735
41	BCC719	Senshutsu 18	KOR	6-row	iSelect, GBS	0.126754
184	BCC1524	Bavaria	DEU	2-row	iSelect, GBS	0.122395
117	BCC1413	Sissy	DEU	2-row	iSelect, GBS	0.110485
74	BCC929	Sanalta	CAN	2-row	iSelect, GBS	0.103636
195	HOR2829	FAO 3444	IRN	2-row	iSelect, GBS	0.0806162
127	BCC1423	Volga	FRA	2-row	iSelect, GBS, EC	0.0609052
33	BCC581	Bana	IND	6-row	iSelect, GBS, EC	0.05784
70	BCC907	Munsing	USA	2-row	iSelect, GBS, EC	0.0416542
204	HOR11371	MR 3/51	ISR	2-row	iSelect, GBS, EC	0.0315571
142	BCC1447	Turquoise	FRA	2-row	iSelect, EC	0.0294958
182	BCC1505	Pallidum 4	UKR	6-row	iSelect, GBS, EC	0.0232059
79	BCC1370	Beatrice	FRA	2-row	iSelect, GBS, EC	0.0224765
152	BCC1461	Omskij 8	RUS	2-row	iSelect, GBS, EC	0.0209404
97	BCC1390	Ingrid	SWE	2-row	iSelect, GBS	0.0203172
15	BCC423	Gang Tuo Qing Ke 1 hao	CHN	6-row	iSelect, GBS, EC	0.0193491
187	BCC1561	HOR 383	BGR	6-row	iSelect, GBS, EC	0.0186793
120	BCC1416	Tellus	SWE	2-row	iSelect, GBS, EC	0.0185134
82	BCC1373	Blenheim	GBR	2-row	iSelect, GBS, EC	0.0153779
72	BCC921	Quibenras	COL	6-row	iSelect	0.0142145
159	BCC1470	Unumli-Arpa	UZB	2-row	iSelect, GBS, EC	0.0142111
207	HOR11374	W 23829/839 11	ISR	2-row	iSelect, GBS, EC	0.0127926
116	BCC1412	Sõrla	SWE	2-row	iSelect, GBS, EC	0.00965156
124	BCC1420	Vada	NLD	2-row	iSelect, GBS, EC	0.00917569
104	BCC1398	MK 42	HUN	2-row	iSelect, GBS, EC	0.00882673
24	BCC447	Mulan	CHN	6-row	iSelect, GBS, EC	0.00854944
135	BCC1439	Kwassitzer Hanna	CZE	2-row	iSelect, GBS, EC	0.00797347
40	BCC718	Sariweon Yugmobori 1	KOR	6-row	iSelect, GBS, EC	0.00788565
39	BCC695	Tongyeong Covered 1	KOR	6-row	iSelect, GBS, EC	0.00605937
201	HOR8113	na	TUR	2-row	iSelect, GBS, EC	0.00521643
178	BCC1498	K 17227	UZB	6-row	iSelect, GBS, EC	0.00483041
118	BCC1414	Spartan	CZE	2-row	iSelect, GBS, EC	0.00403294
17	BCC432	Fu 8	CHN	2-row	iSelect, GBS, EC	0.00400044
52	BCC817	Beecher	USA	6-row	iSelect, GBS, EC	0.00348568
20	BCC438	Manchuria Native 1	CHN	6-row	iSelect, GBS, EC	0.00340511
205	HOR11372	W 23833/818	ISR	2-row	iSelect, EC	0.00309802
110	BCC1405	Plumage Archer	GBR	2-row	iSelect, GBS, EC	0.00288623
89	BCC1381	Georgie	GBR	2-row	iSelect, GBS, EC	0.00247384
143	BCC1448	Agneta	FIN	6-row	iSelect, GBS, EC	0.0018526
88	BCC1380	Gavotte	FRA	2-row	iSelect, GBS	0.00129734
140	BCC1444	Slovensky 82	CZE	2-row	iSelect, GBS, EC	0.00103426
13	BCC219	K-1628	TJK	6-row	iSelect, GBS, EC	0.000936756
189	BCC1566	HOR 753	GRC	2-row	iSelect, GBS, EC	0.000708272
43	BCC761	Ulleri 2	NPL	6-row	iSelect	0.000698366
